# Supplementary material for: Prognostic Relevance of Estrogen Receptor Status in Circulating Tumor Cells in Breast Cancer Patients Treated With Endocrine Therapy
Source: PubMed Central journal article supplement (PMC9097586; doi:10.3389/fonc.2022.866293), 2022-04-28
Supplement: DataSheet_1.pdf [file DataSheet_1.pdf]

## *Supplementary Material*

### 1 Supplementary Figures and Tables

#### 1.1 Supplementary Table

**Supplementary Table 1.** Characterization of endocrine therapies included in the study.

| Category based on mechanisms                 | Drugs               | Number (percentage) | Disease control rate (DCR%) | PFS (range/median) |
|----------------------------------------------|---------------------|---------------------|-----------------------------|--------------------|
| Aromatase inhibitor (AI)                     | Exemestane          | 8 (22.2%)           | 62.5                        | 1-5/3              |
| Aromatase inhibitor (AI)                     | Anastrozole         | 8 (22.2%)           | 62.5                        | 2-9/4.5            |
| Aromatase inhibitor (AI)                     | Letrozole           | 1 (2.8%)            | 100                         | 6/6                |
| Selective estrogen receptor modulator (SERM) | Toremifene          | 2 (5.6%)            | 50                          | 2-5/3.5            |
| Selective estrogen receptor modulator (SERM) | Tamoxifen           | 4 (11.1%)           | 100                         | 6-9/7              |
| Selective estrogen receptor modulator (SERM) | Fulvestrant         | 10 (27.8%)          | 60                          | 1-7/3.5            |
| Progestogen                                  | Medroxyprogesterone | 3 (8.3%)            | 66.7                        | 1-17/3             |

## 1.2 Supplementary Figures

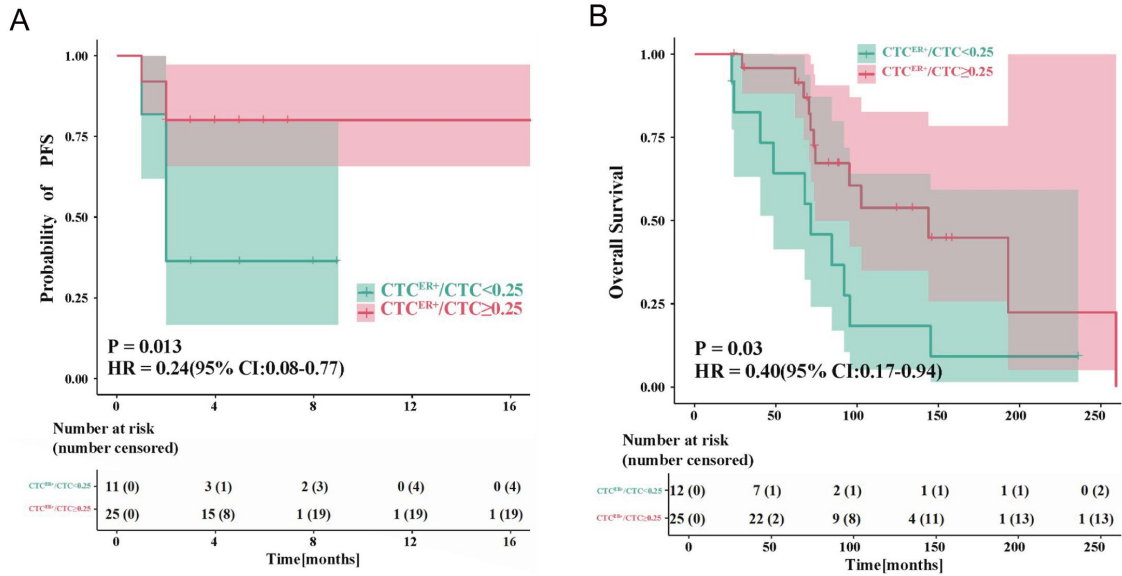

**Supplementary Figure 1.** Evaluation of the ratio of ER-positive CTCs to total CTCs in response to endocrine therapy to predict PFS and OS. **(A)** The PFS between the group of  $CTC^{ER+}/CTC < 0.25$  and the group of  $CTC^{ER+}/CTC \geq 0.25$  showed that there existed a significant difference between these two groups ( $P < 0.05$ ). **(B)** The OS between the group of  $CTC^{ER+}/CTC < 0.25$  and the group of  $CTC^{ER+}/CTC \geq 0.25$  showed that there existed a significant difference between these two groups ( $P < 0.05$ ).

### 1.3 Supplementary Figures

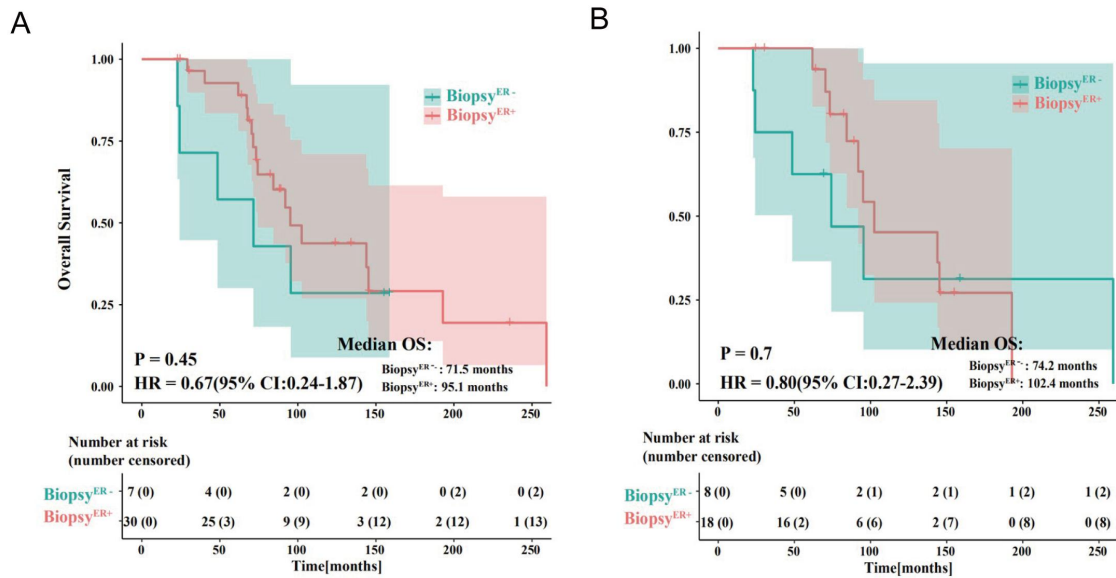

**Supplementary Figure 2.** Evaluation of ER expression in primary lesion and metastasis lesion IHC results to predict OS. **(A)** While the patients on the basis of the ER status of the primary lesion IHC results into ER-positive and ER-negative, the OS showed no significant difference between these two groups ( $P=0.45$ ). **(B)** While the patients on the basis of the ER status of the metastasis lesion IHC results into ER-positive and ER-negative, the OS showed no significant difference between these two groups ( $P=0.7$ ).
